# Supplementary material for: Variation in bacterial composition, diversity, and activity across different subglacial basal ice types
Source: Copernicus journal article supplement (doi:10.5194/tc-16-4033-2022), 2022-10-07

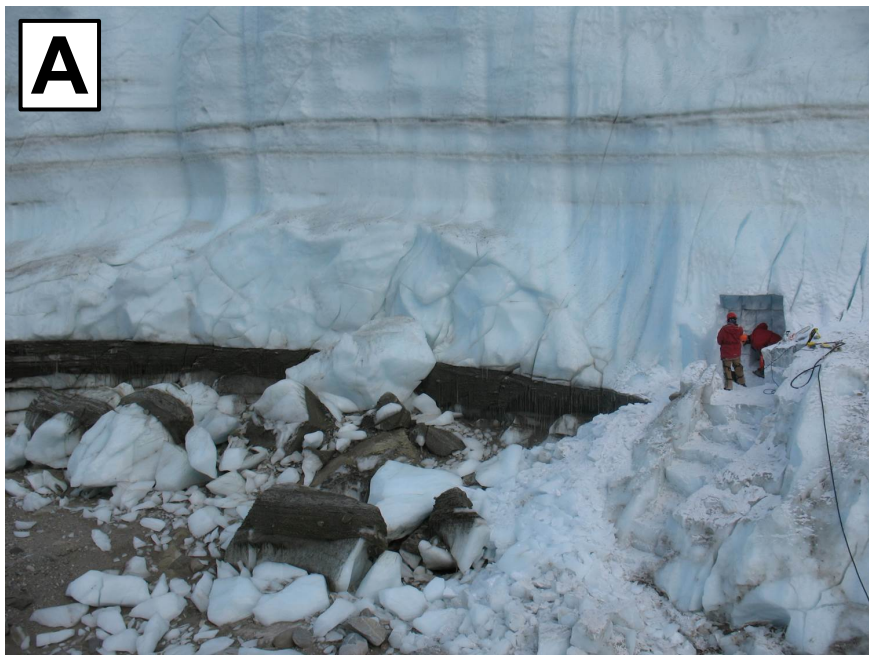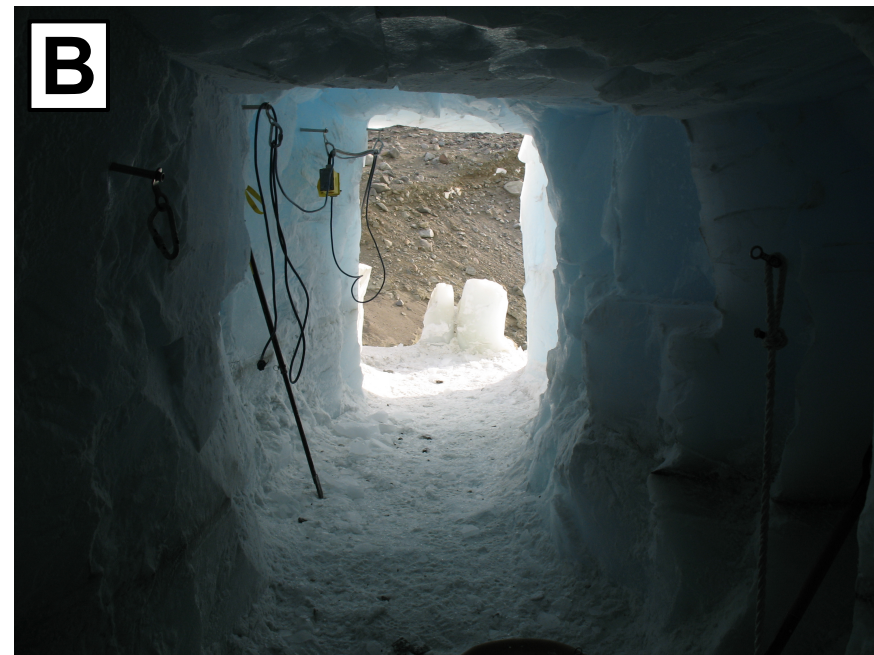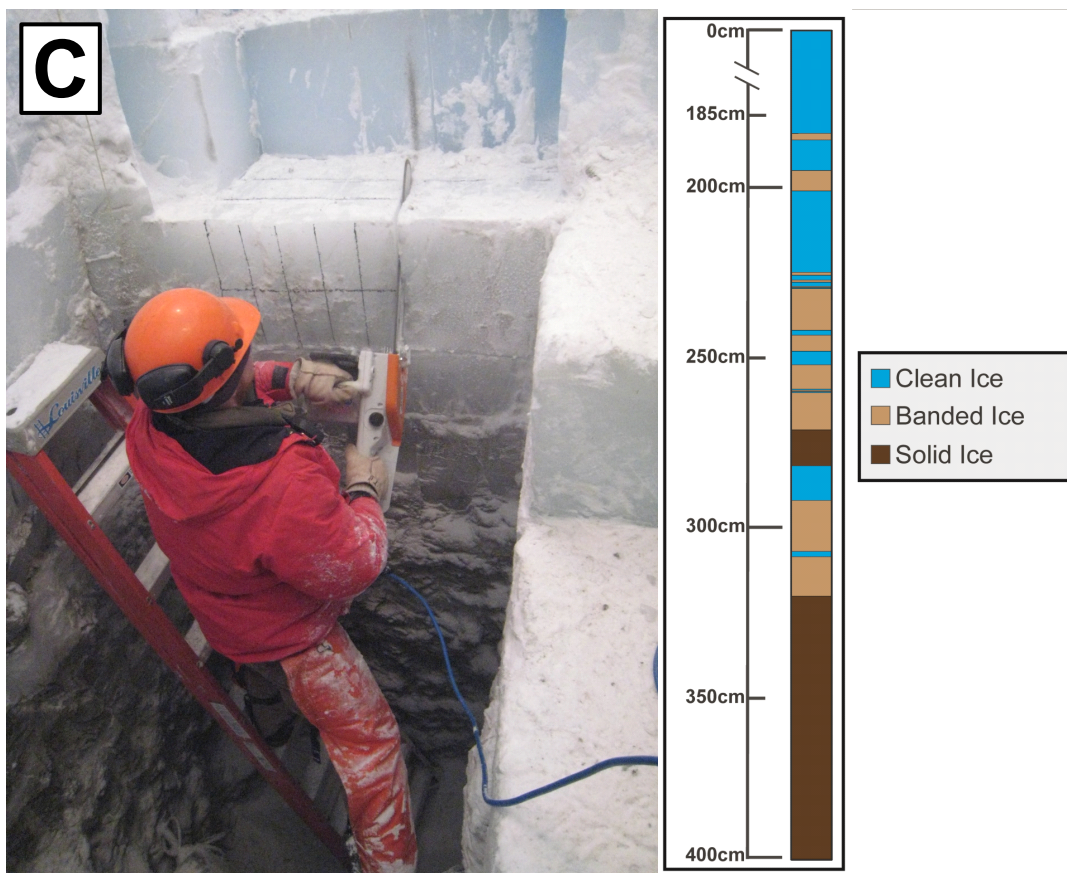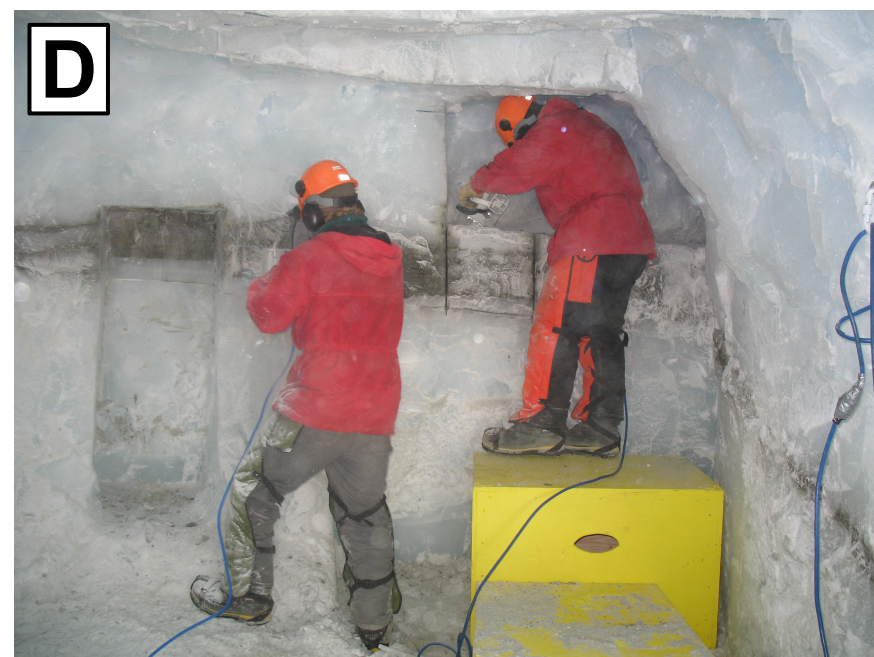

**Figure S1.** **[A]** A subglacial tunnel was excavated into the basal zone of Taylor Glacier's northern lateral margin. **[B]** View from inside one of the excavation tunnels. **[C]** During the 2007 expedition, a vertical shaft was excavated and stratigraphic sequence of multiple basal ice types was sampled. **[D]** During the 2009 expedition, a large chamber was excavated to sample a horizon of debris-rich banded basal ice.

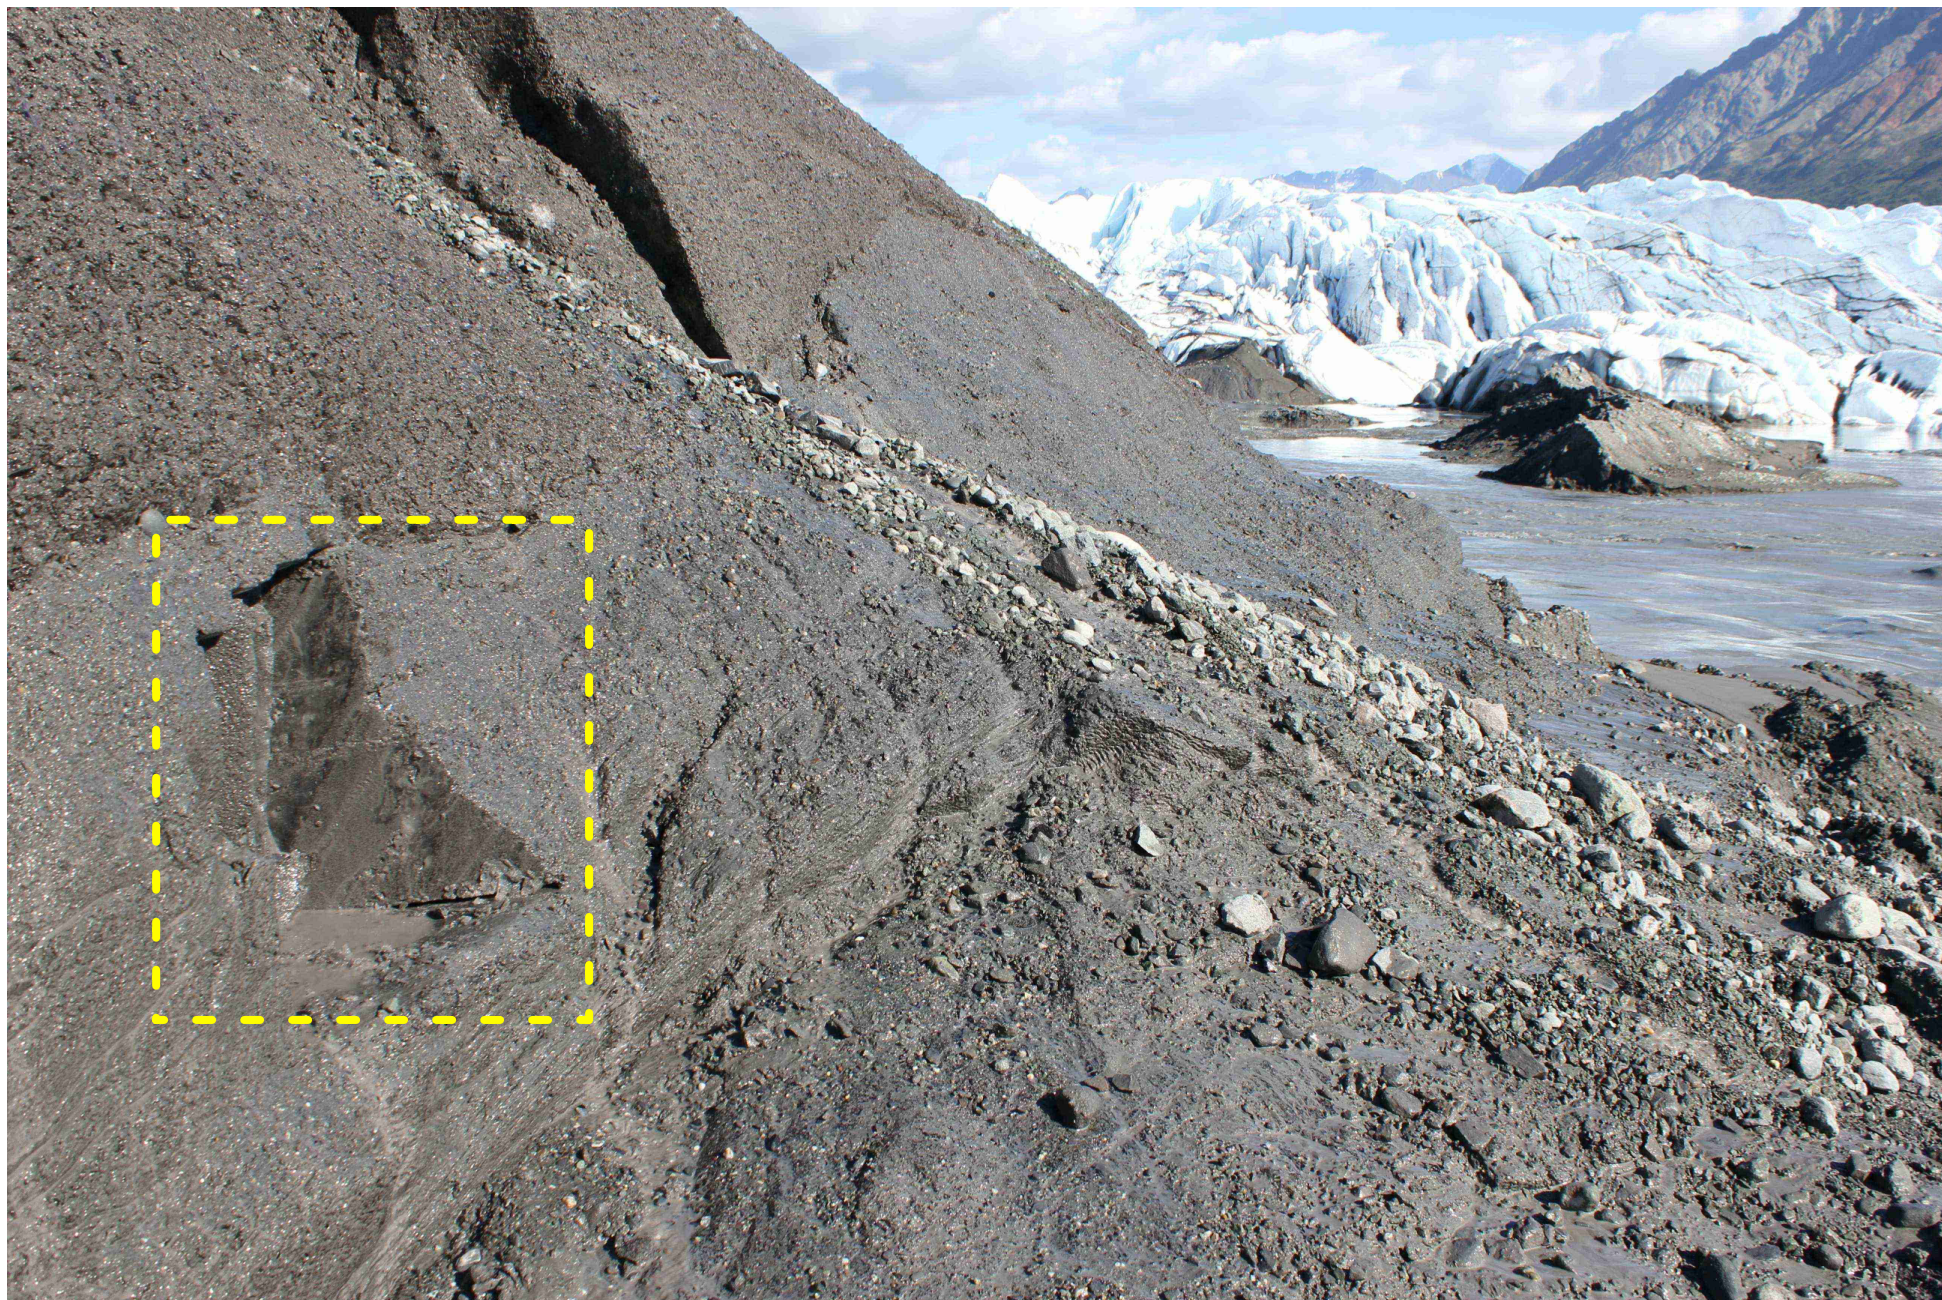

**Figure S2.** An exposed horizon debris-rich basal ice near the terminus of Matanuska Glacier, Alaska. The sampled area, collected using an electric chainsaw, is highlighted inside the yellow-box. The area denoted by the yellow-box is approximately 1m<sup>2</sup>.

Clean Ice

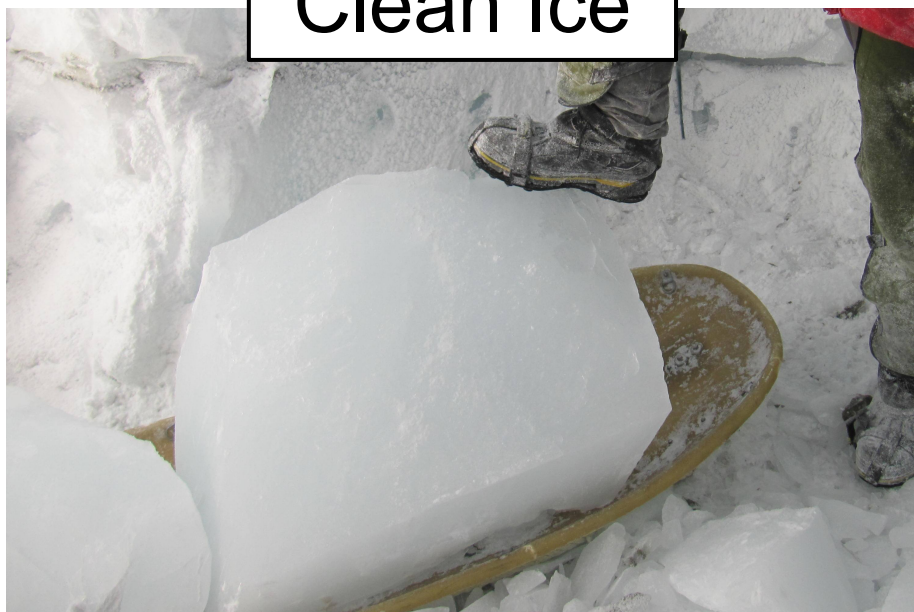

Banded Ice

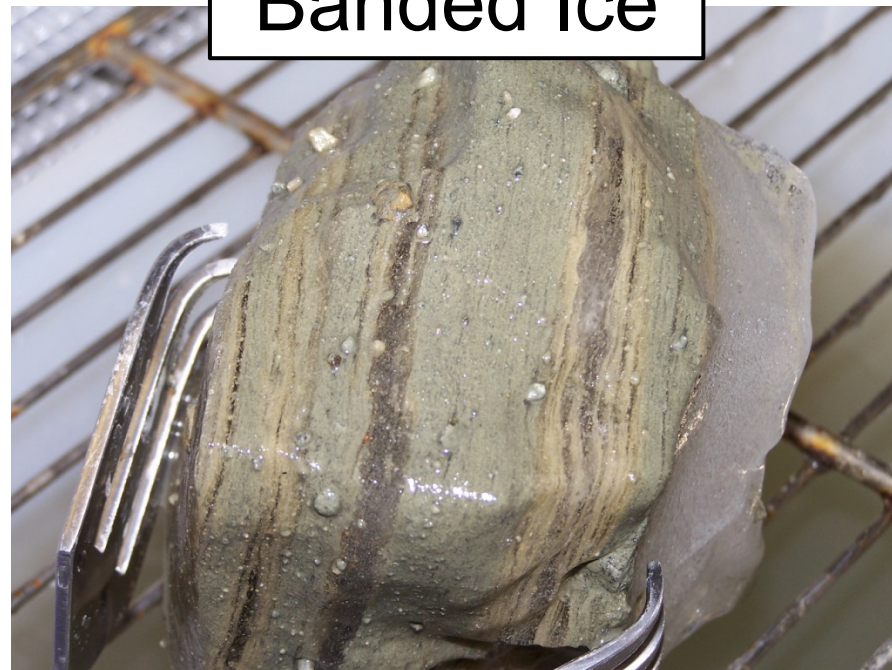

Solid Ice

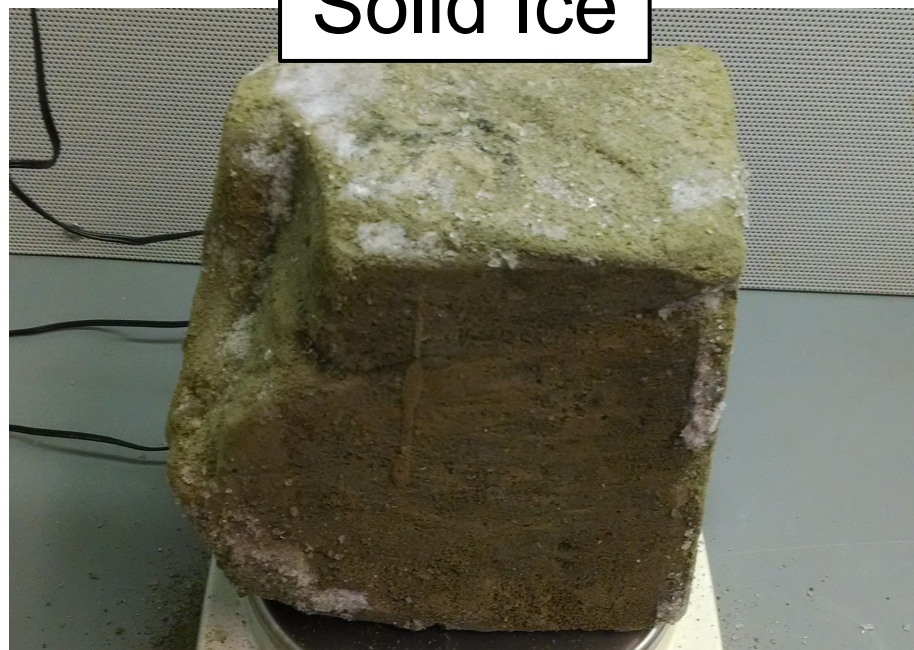

Dispersed Ice

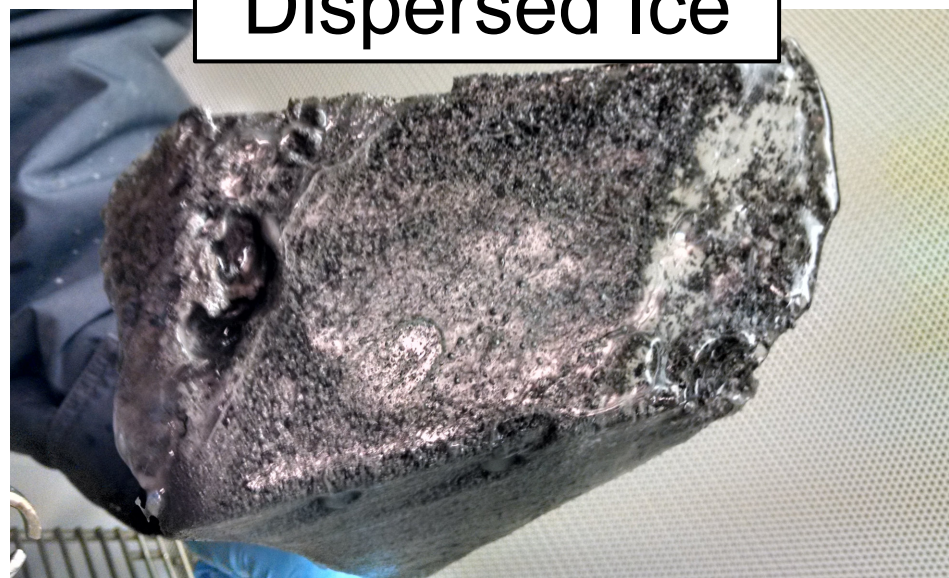

**Figure S3.** Examples of each type of basal ice analyzed in this study. Clean ice, banded ice, and solid ice were collected from Taylor Glacier, Antarctica. Dispersed ice was collected from Matanuska Glacier, Alaska.

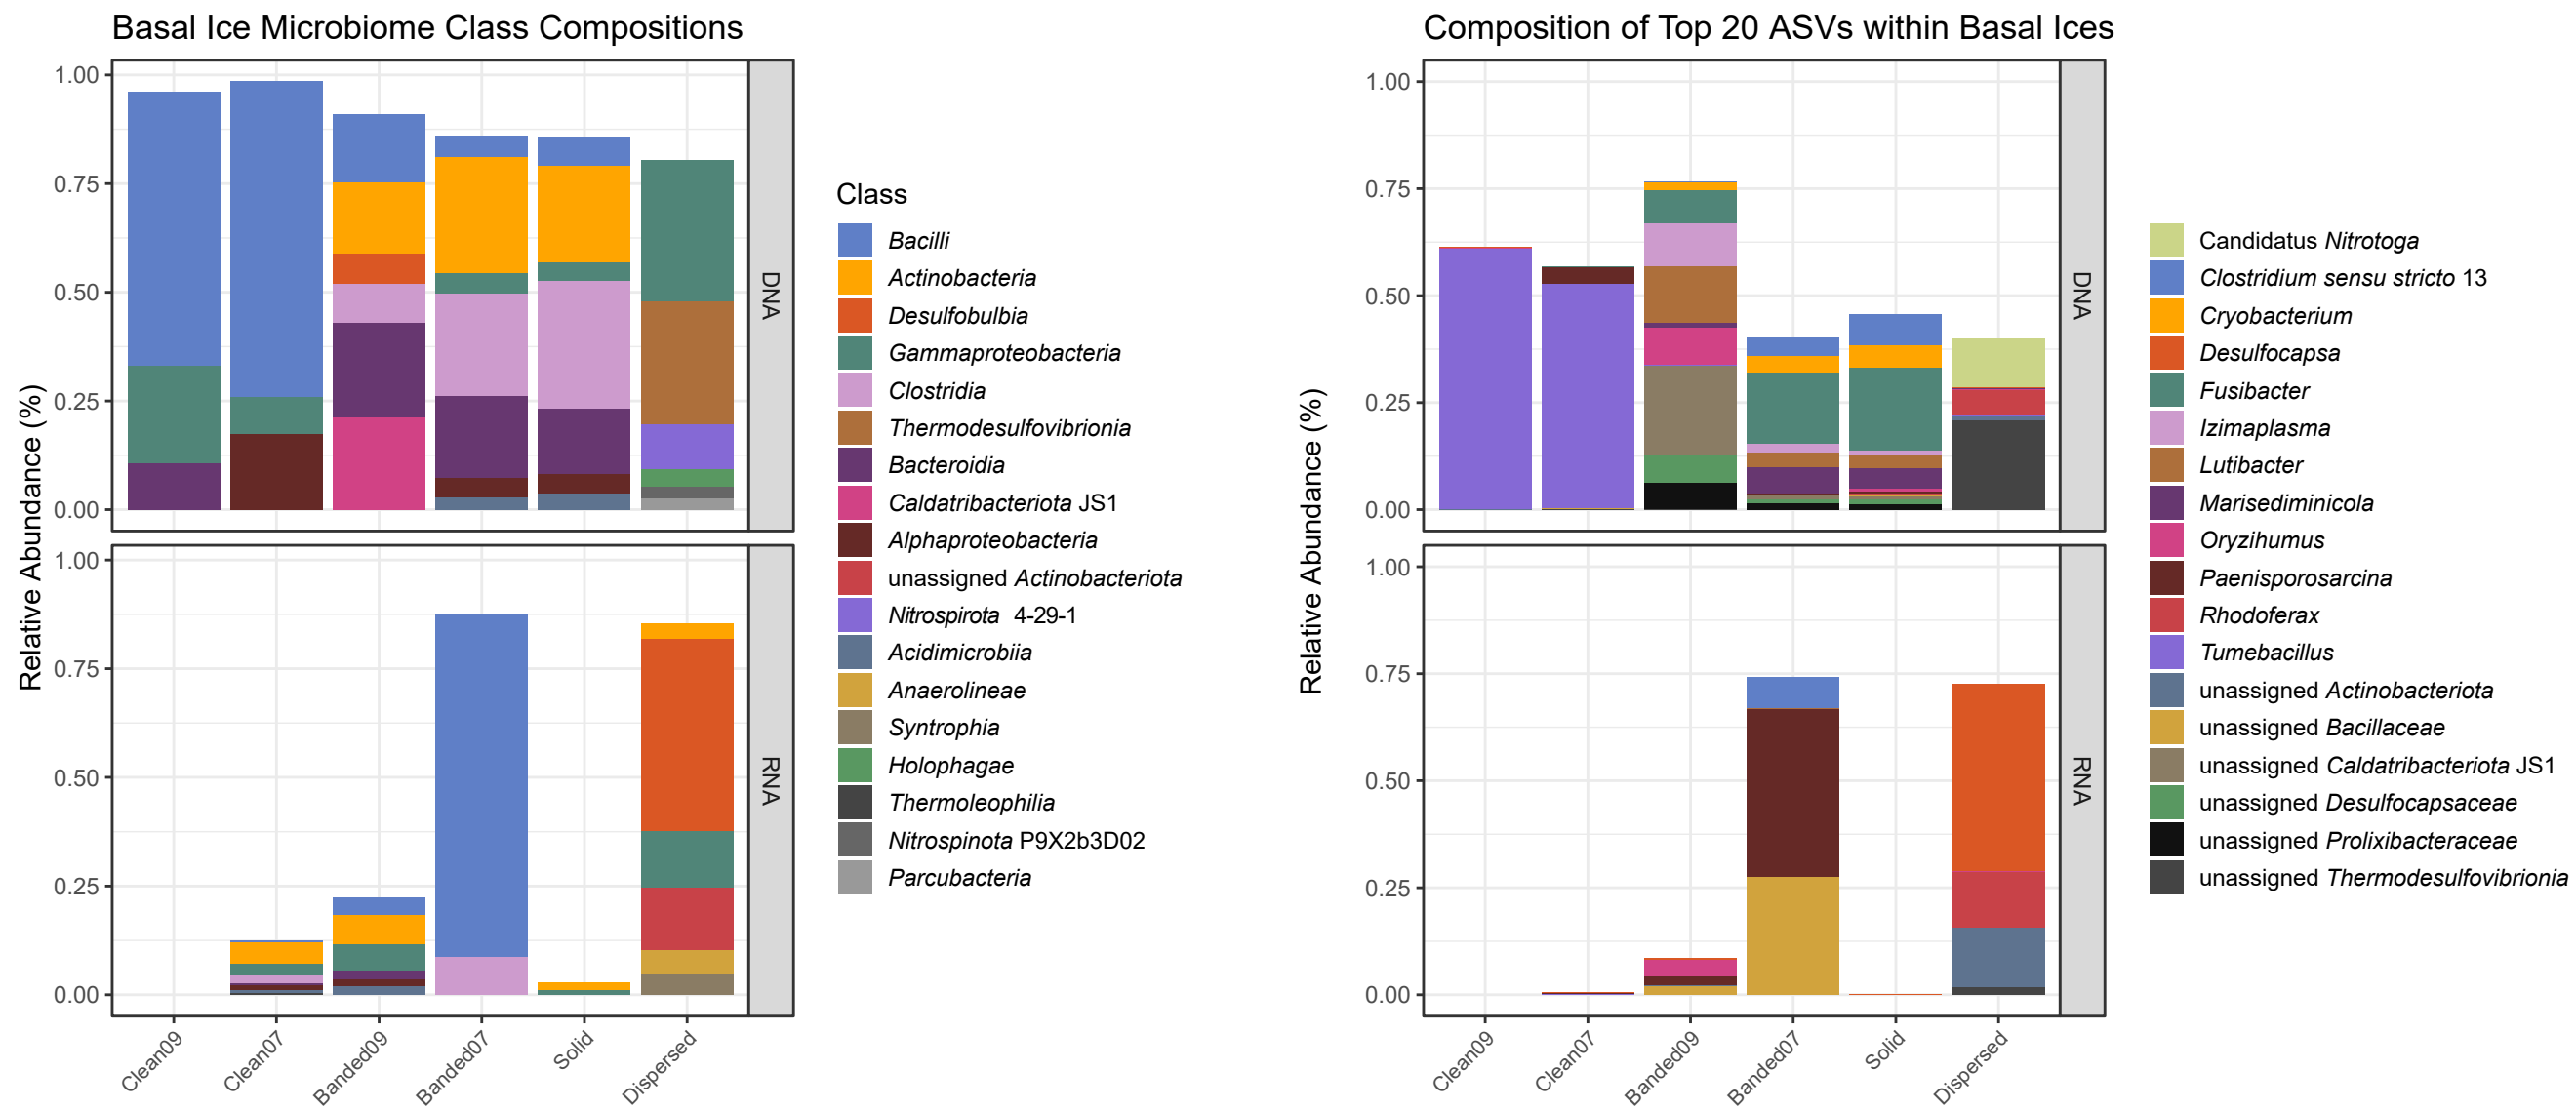

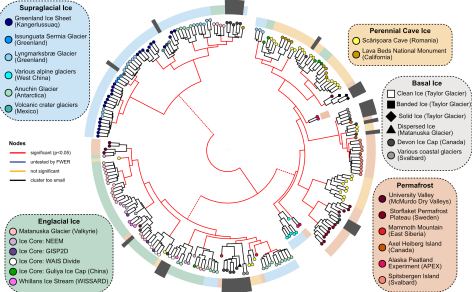

**Figure S5.** Hierarchical cluster analysis of wUF distances between samples using Ward's minimum variance method. The significance of each node was calculated with a Monte Carlo simulation using the 'sigclust2' R package. Family-wise error rate (FWER) was controlled across the dendrogram using a sequential testing procedure starting at the central node. The three dashed branches in the dendrogram were lengthened slightly to improve legibility and are thus not to scale. Note, WISSARD samples were collected via hot-water drilling and thus represent an integrated sample of firn and englacial ice.

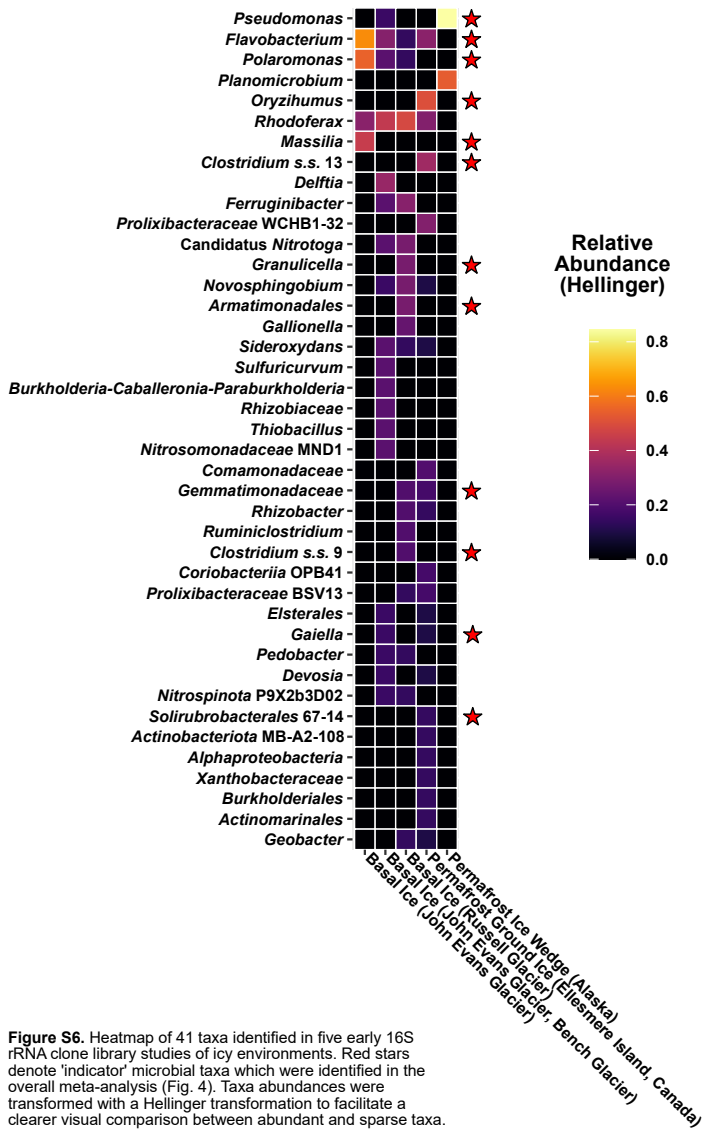

Supplement: Supplementary file 1 [file tc-16-4033-2022-supplement.zip › Doyle_TC_Supplemental_Figures.pdf]
