# Supplementary material for: Variation in bacterial composition, diversity, and activity across different subglacial basal ice types
Source: Copernicus journal article supplement (doi:10.5194/tc-16-4033-2022), 2022-10-07
Supplement: Supplementary file 1 [file tc-16-4033-2022-supplement.zip]

Archive with 3 entries (3 files):
- Doyle_TC_Supplemental_Figures.pdf
- tc-16-4033-2022-supplement-title-page.pdf
- Doyle_TC_Supplemental_Tables.xlsx
