# Supplementary material for: Variation in bacterial composition, diversity, and activity across different subglacial basal ice types
Source: Copernicus journal article supplement (doi:10.5194/tc-16-4033-2022), 2022-10-07
Supplement: Supplementary file 1 [file tc-16-4033-2022-supplement.zip › tc-16-4033-2022-supplement-title-page.pdf]

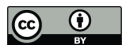

*Supplement of*

**Variation in bacterial composition, diversity, and activity across different subglacial basal ice types**

**Shawn M. Doyle and Brent C. Christner**

*Correspondence to:* Shawn M. Doyle ([shawndoyle@tamu.edu](mailto:shawndoyle@tamu.edu))

- [tc-16-4033-2022-supplement-title-page.pdf](#)
- [Doyle\\_TC\\_Supplemental\\_Figures.pdf](#)
- [Doyle\\_TC\\_Supplemental\\_Tables.xlsx](#)

The copyright of individual parts of the supplement might differ from the article licence.
